# Supplementary material for: The IL-17A/IL-17RA Axis Is Not Related to Overall Survival and Cancer Stem Cell Modulation in Pancreatic Cancer
Source: MDPI journal article supplement (doi:10.3390/ijms21062215), 2020-03-23
Supplement: s1 [file s1]

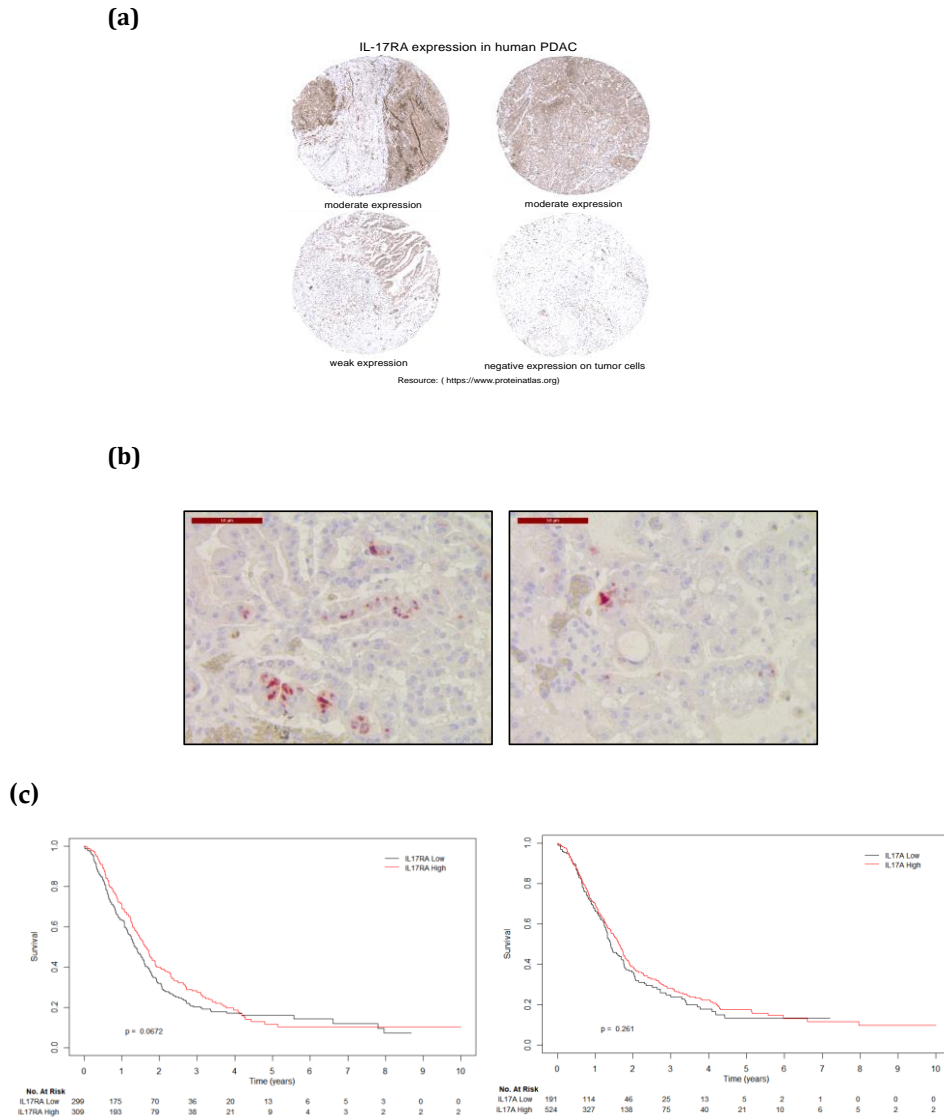

**Figure S1.** IL-17RA expression in human and mouse PDAC. (a) Publicly available PDAC samples showed a weak to moderate expression of IL-17RA ([www.proteinatlas.org](https://www.proteinatlas.org)). (b) Pancreatic cancer cells express IL-17RA in a mouse model of pancreatic cancer. (c) Survival analysis of IL-17RA and IL-17A expression retrieved from the publicly available transcriptomic data of 903 patients with PDAC. There is no statistical significance between the survival of low (< 33rd percentile) and high (> 66th percentile) expression tumors regarding these two markers.
